# Supplementary material for: Evolution of C4 photosynthesis predicted by constraint-based modelling
Source: eLife journal article supplement (doi:10.7554/elife.49305), 2019-12-04
Supplement: supp [file elife-49305-supp-v1.zip]

Archive with 5 entries (5 files):
- elife_poa_e49305_Figure_1_figure_supplement_1.pdf
- elife_poa_e49305_Figure_6_figure_supplement_1.pdf
- elife_poa_e49305_Figure_3_figure_supplement_1.pdf
- elife_poa_e49305_Figure_1_figure_supplement_2.pdf
- elife_poa_e49305_Transparent_Reporting_File.docx
