# Supplementary material for: Evolution of C4 photosynthesis predicted by constraint-based modelling
Source: eLife journal article supplement (doi:10.7554/elife.49305), 2019-12-04
Supplement: supp [file elife-49305-supp-v1.zip › elife_poa_e49305_Figure_1_figure_supplement_2.pdf]

(A) ATP

## Production

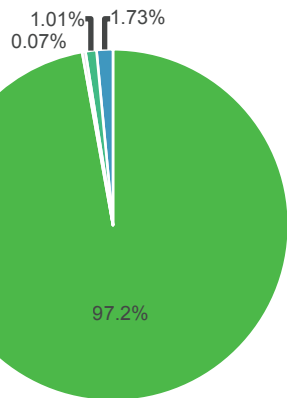

- photosynthesis, light reaction
- canonical glycolysis
- oxidative phosphorylation
- Others

## Consumption

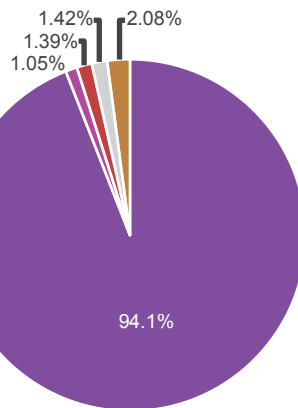

- reductive pentose-phosphate cycle
- starch biosynthetic process
- nucleotide metabolic process
- photorespiration
- Others

(B) NADPH

## Production

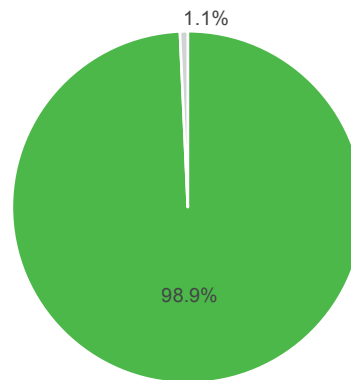

- photosynthesis, light reaction
- Others

## Consumption

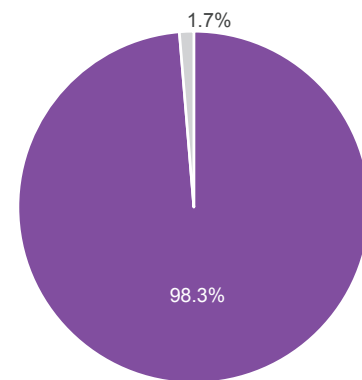

- reductive pentose-phosphate cycle
- Others

(C) NADH

## Production

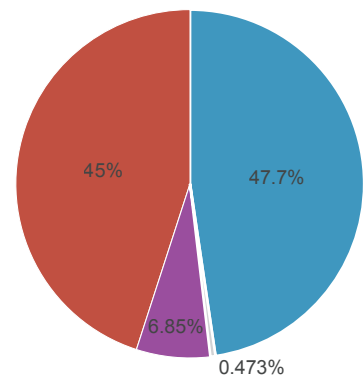

- canonical glycolysis
- photorespiration
- pyruvate dehydrogenase activity
- Others

## Consumption

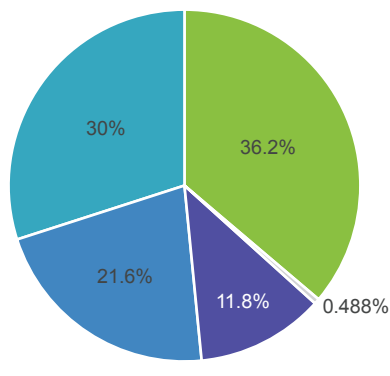

- nitrate assimilation
- glutamate biosynthetic process
- glyoxylate cycle
- alternative respiration
- Others

(D) Energy Equivalents

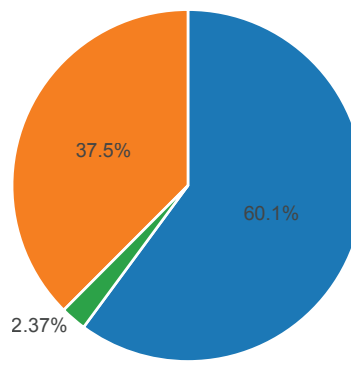

- ATP
- NADPH
- NADH

(E) Respiratory ATP

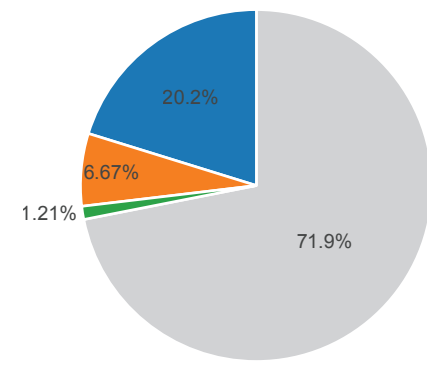

- maintenance, chloroplast
- maintenance, cytosol
- maintenance, mitochondria
- Other
