# Supplementary figures and images for: Evolution of C4 photosynthesis predicted by constraint-based modelling
Source: eLife journal article supplement (doi:10.7554/elife.49305), 2019-12-04

(A)

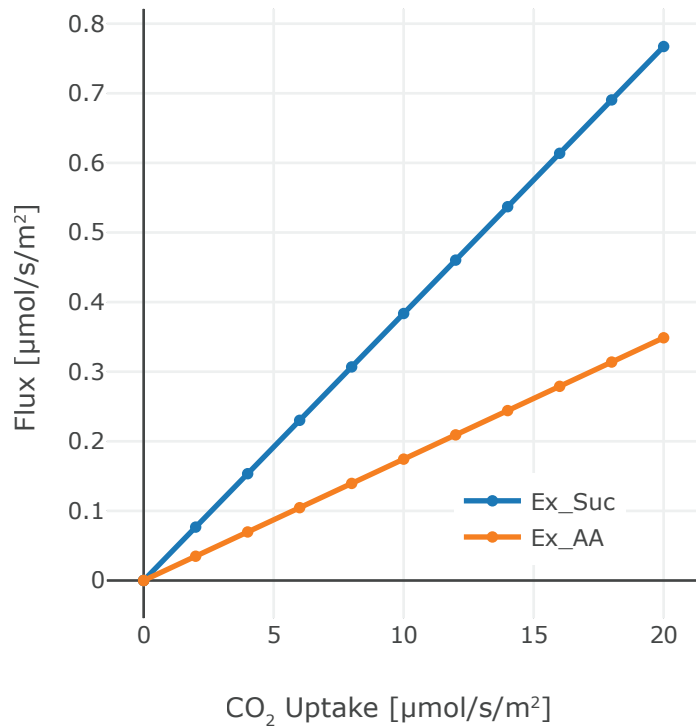

(B)

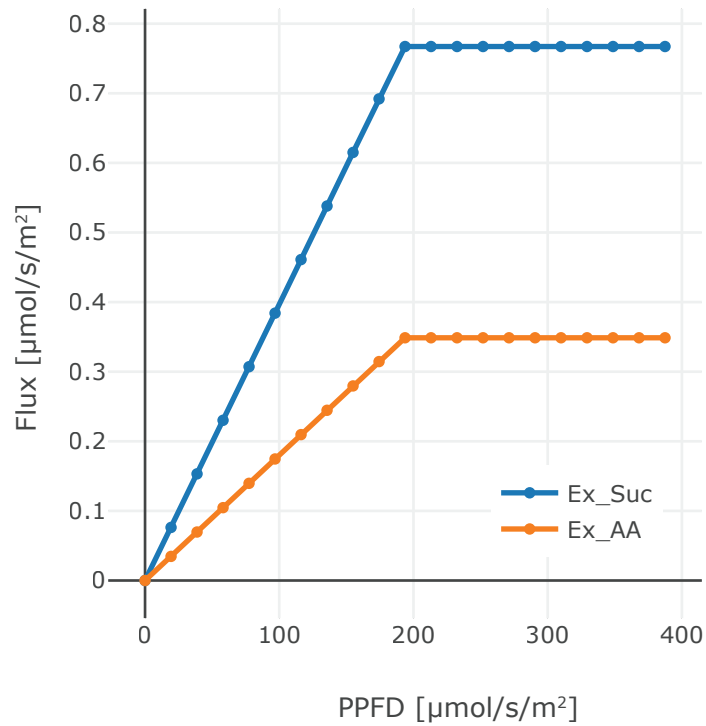

Supplement: supp [file elife-49305-supp-v1.zip › elife_poa_e49305_Figure_1_figure_supplement_1.pdf]

(A)

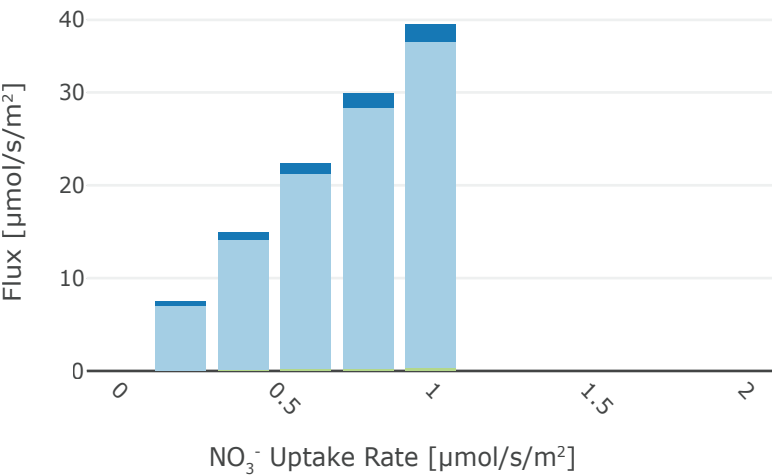

(B)

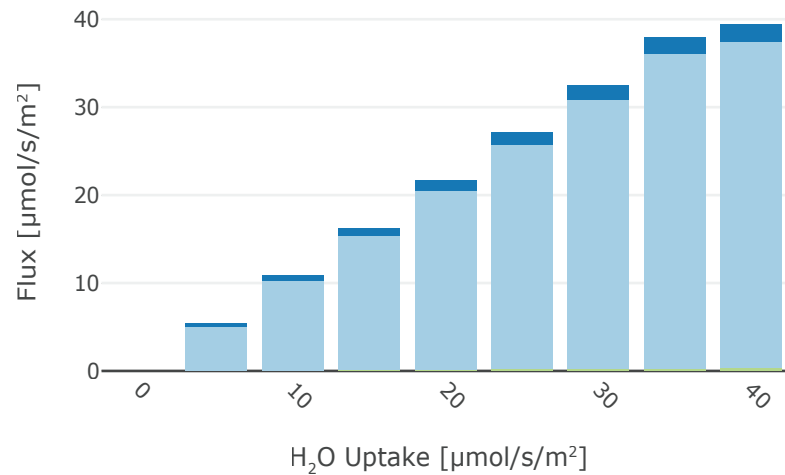

(C)

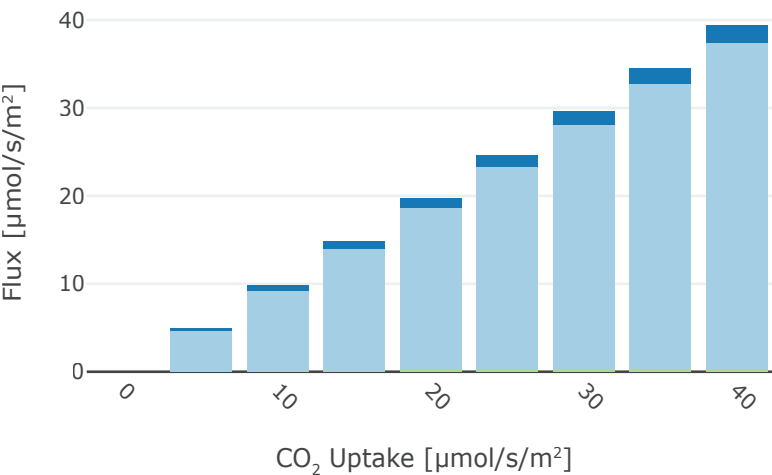

(D)

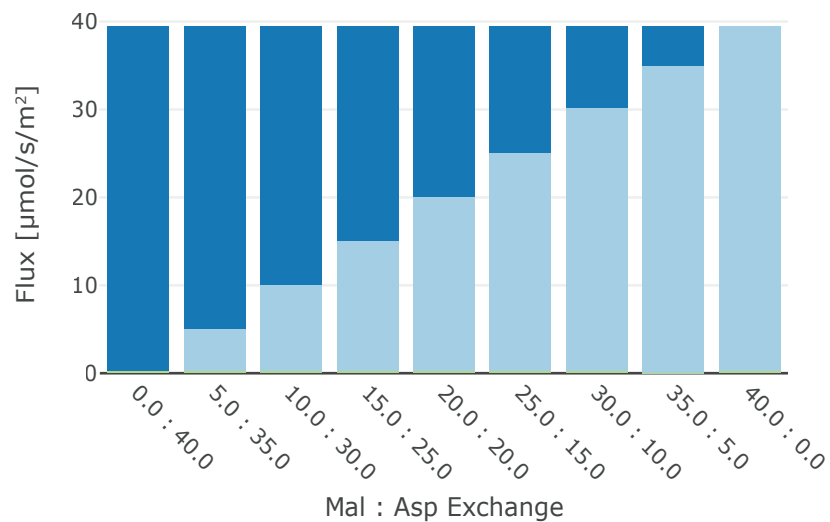

PEPCK NADP-ME NAD-ME

Supplement: supp [file elife-49305-supp-v1.zip › elife_poa_e49305_Figure_6_figure_supplement_1.pdf]
